# Supplementary material for: Functional reduction in pollination through herbivore-induced pollinator limitation and its potential in mutualist communities
Source: PubMed Central journal article supplement (PMC5725495; doi:10.1038/s41467-017-02072-4), 2017-12-11
Supplement: 41467_2017_2072_MOESM3_ESM.pdf [file 41467_2017_2072_MOESM3_ESM.pdf]

## **Description of Additional Supplementary Files**

File Name: Supplementary Data 1

Description: Field data used to find functional form of HIPL and to compile Figures 1 and 2.
